# Supplementary material for: A data-driven XRD analysis protocol for phase identification and phase-fraction prediction of multiphase inorganic compounds
Source: Royal Society of Chemistry journal article supplement (doi:10.1039/d0qi01513j), 2021-01-01
Supplement: d0qi01513j1.pdf [file d0qi01513j1.pdf]

# Supplementary information

## **A data-driven XRD analysis protocol for phase identification and phase-fraction prediction of multiphase inorganic compounds**

Jin-Woong Lee,<sup>a,†</sup> Woon Bae Park,<sup>b,†</sup> Minseuk Kim,<sup>a</sup> Satendra Pal Singh,<sup>a</sup> Myounggho Pyo,<sup>b,\*</sup> and Kee-Sun Sohn<sup>a,\*</sup>

<sup>a</sup>Nanotechnology & Advanced Materials Engineering, Sejong University, 209 Neungdong-ro, Gwangjin-gu, Seoul, 143-747, South Korea

<sup>b</sup>Department of Printed Electronics, Sunchon National University, 291-19 Jungang-ro, Suncheon, Chonnam, 540-742, South Korea

<sup>†</sup>These authors contributed equally

Corresponding authors: [kssohn@sejong.ac.kr](mailto:kssohn@sejong.ac.kr), [mho@sunchon.ac.kr](mailto:mho@sunchon.ac.kr)

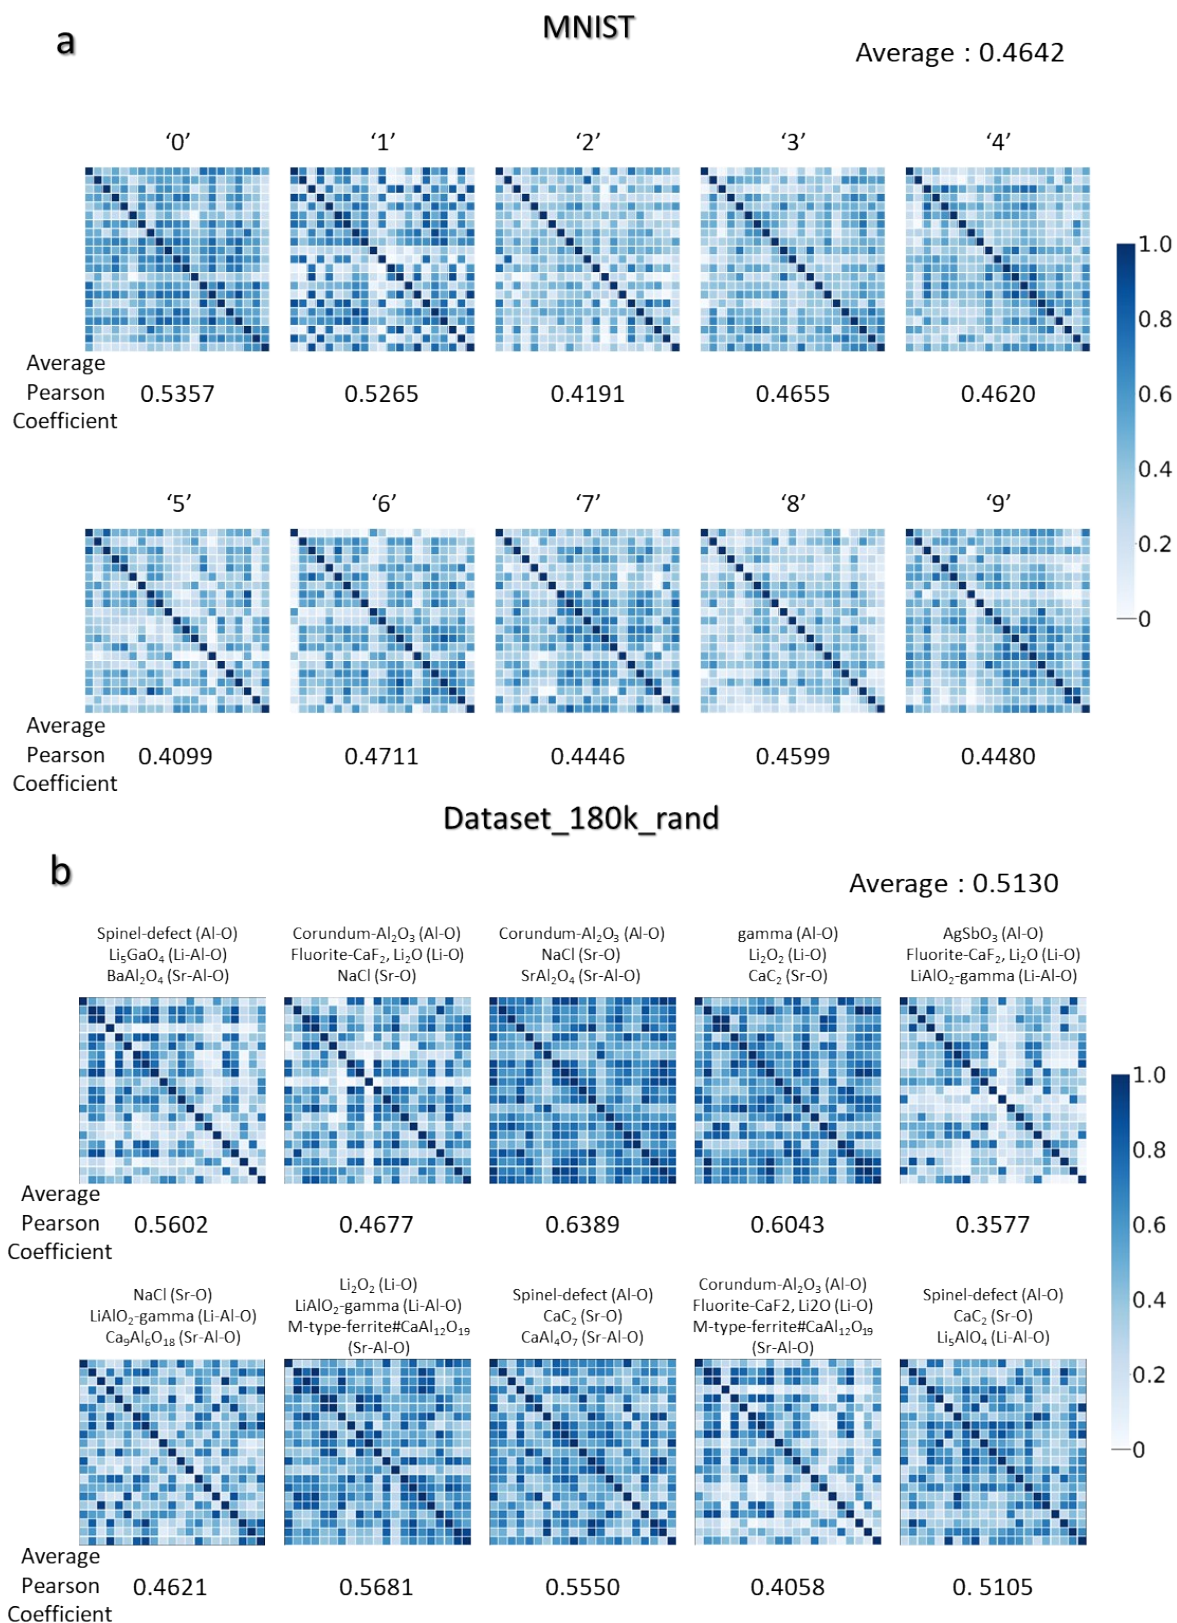

**Figure S1** The similarity issue should be quantized by a reliable correlation metric such as the Pearson correlation coefficient. The correlation among the samples in a class (so-called intra-class correlation) was quantized using the Pearson correlation matrix. **a** Pearson correlation coefficient

matrixes for 10 randomly chosen classes (in fact, including the classes that all the real-world data belong to) were obtained from the D2 dataset. A randomly chosen 66 samples from each of the 10 classes were used for constituting the following Pearson correlation coefficient matrixes. **b** The well-known MNIST datasets were also analyzed in terms of the correlation for comparison to the D2 dataset. Randomly chosen 21 samples from each of the classes (10 digits) were used to constitute the following Pearson correlation coefficient matrixes. **c** Pearson correlation coefficient matrixes obtained from the Dataset\_180k\_rand in our previous report<sup>2</sup>.

## CNN\_2 Architecture

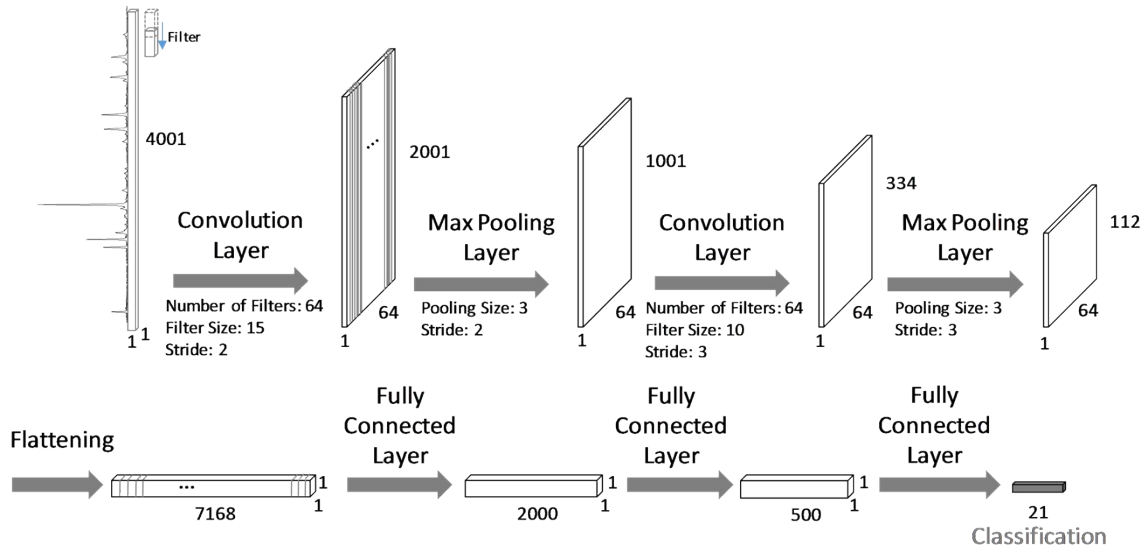

## CNN\_3 Architecture

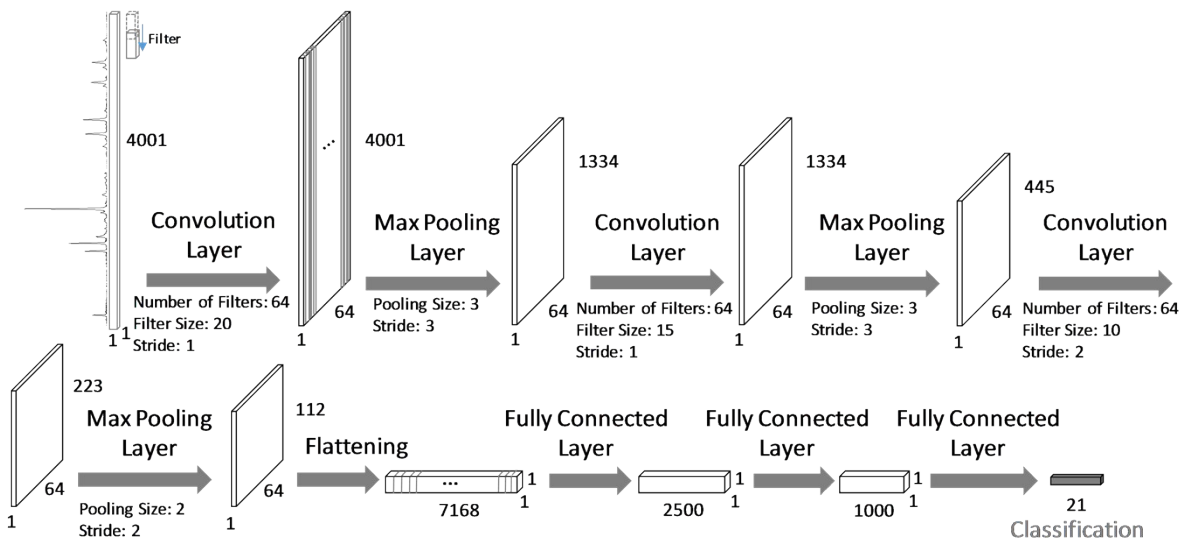



### CNN\_4 Architecture

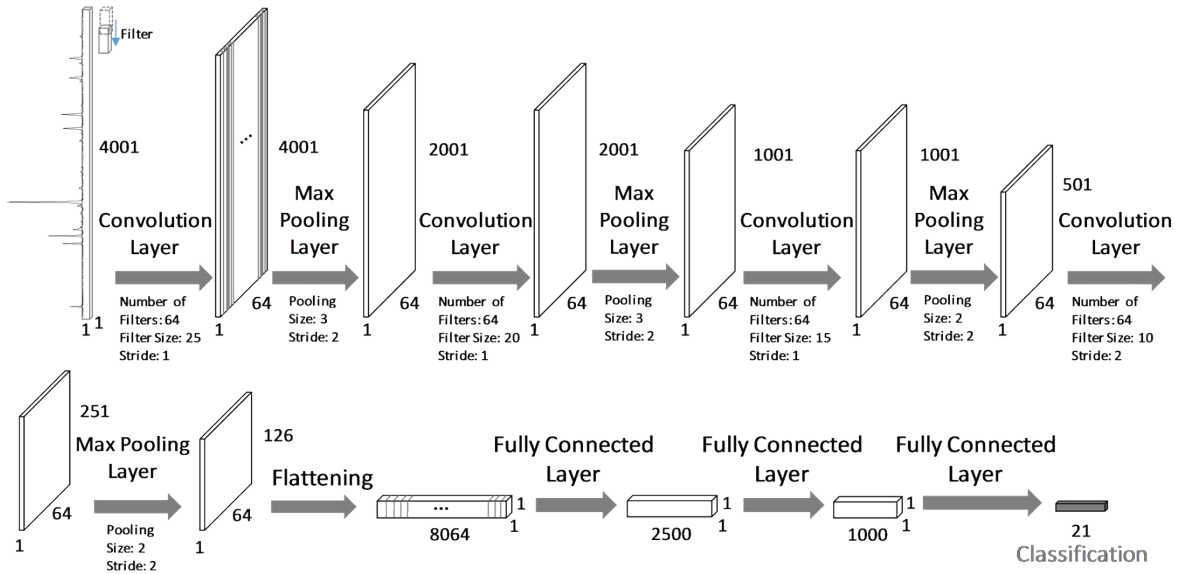

### CNN\_5 Architecture

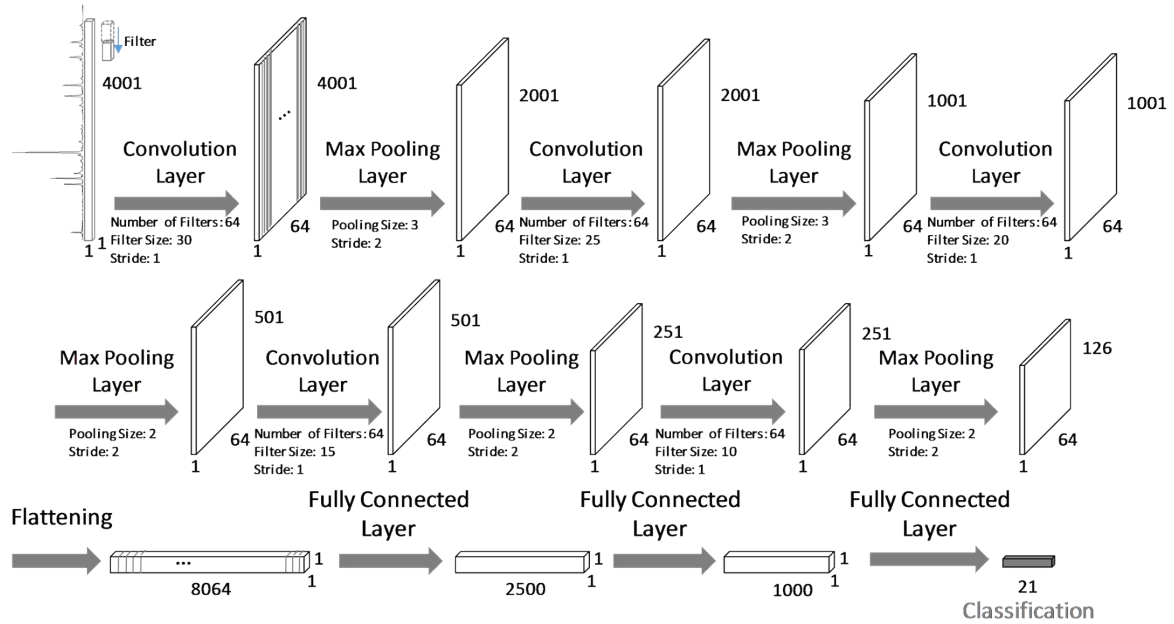

**Figure S2** CNN\_2 ~ CNN\_5 architectures consisting of two ~ five convolution/max pooling layers, respectively. Three ensuing fully connected common layers followed. The number of filters, the kernel size, the pooling size, and the stride are also given. The padding type was the "SAME" for all CNNs. The drop-out was adopted only for the fully connected layers.

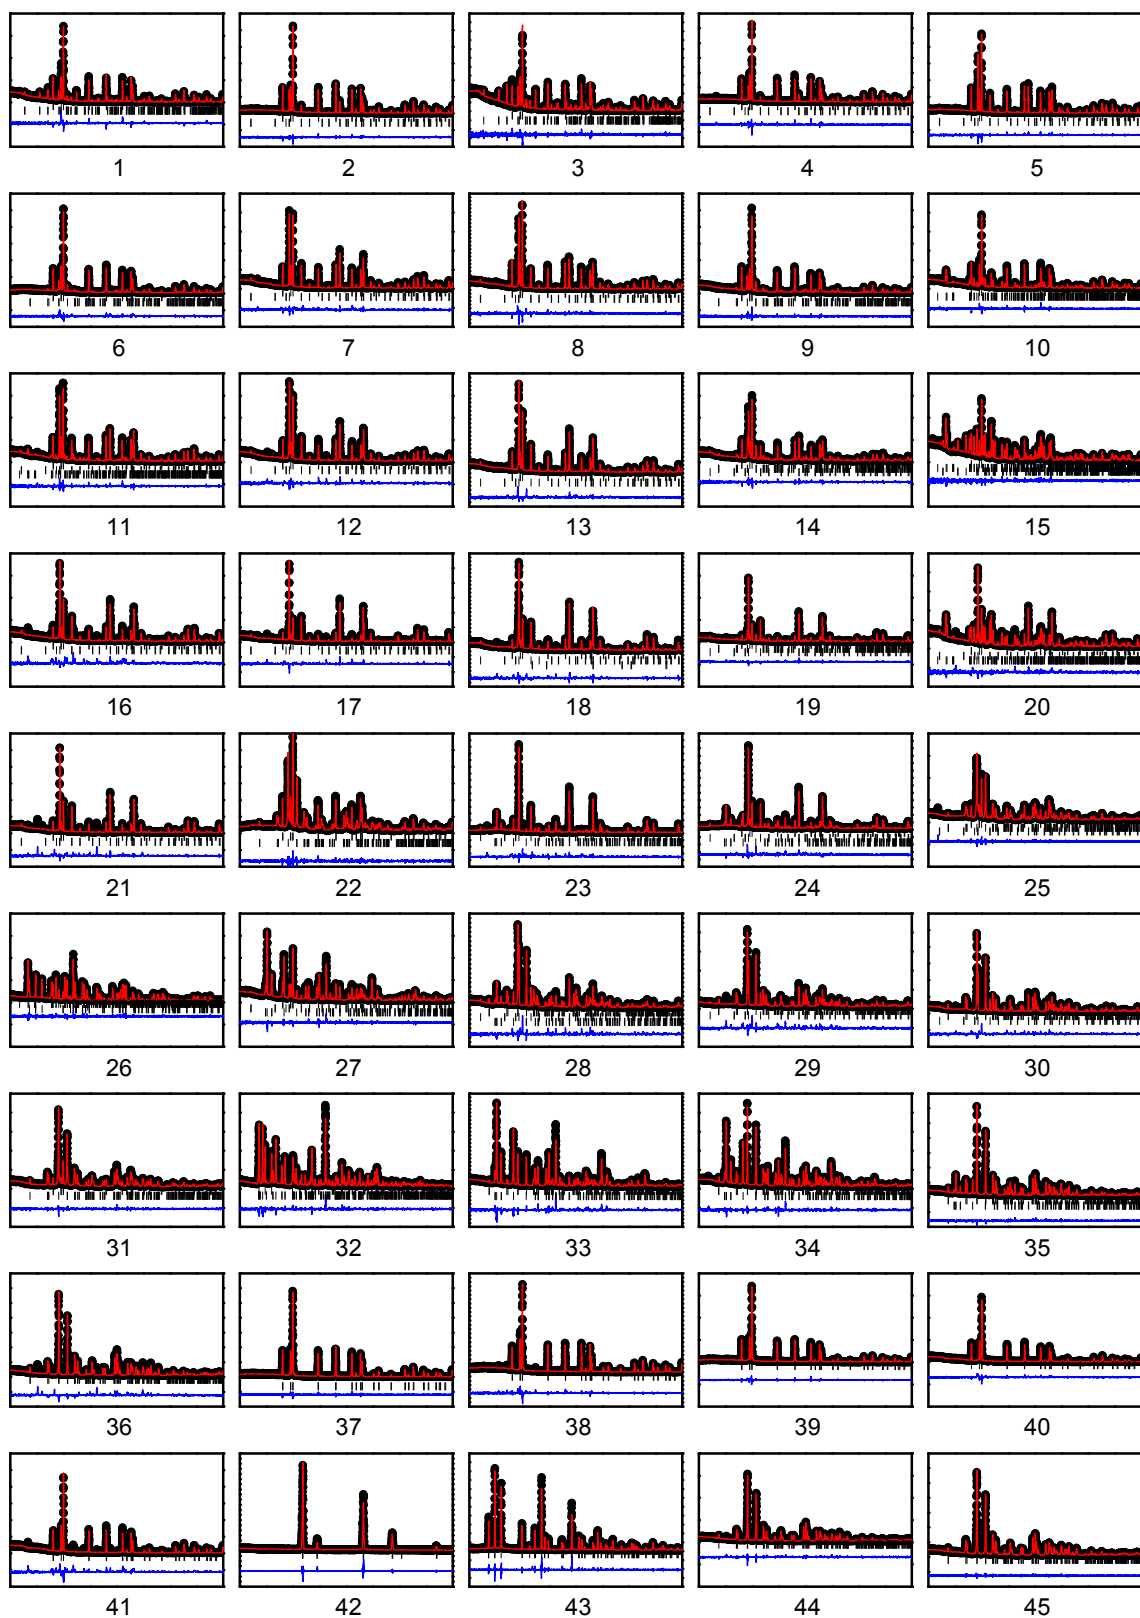

Figure S3 The Rietveld refinement results for 45 real-world XRD patterns.

## The list of 218 constituent compounds (21 structure groups)

| 21 Groups                                                              | ICSD_ Num | Compou nd                      | Space Group                  | Lattice Parameter |            |            |          |         |          |
|------------------------------------------------------------------------|-----------|--------------------------------|------------------------------|-------------------|------------|------------|----------|---------|----------|
|                                                                        |           |                                |                              | a                 | b          | c          | $\alpha$ | $\beta$ | $\gamma$ |
| Fluorite-CaF <sub>2</sub> ,<br>Li <sub>2</sub> O (Li-O)<br>Srtuc_Num_0 | 22402     | Li <sub>2</sub> O              | Fm-3m (225)                  | 4.61              | 4.61       | 4.61       | 90       | 90      | 90       |
|                                                                        | 54368     | Li <sub>2</sub> O              | Fm-3m (225)                  | 4.610(5)          | 4.610(5)   | 4.610(5)   | 90       | 90      | 90       |
|                                                                        | 57411     | Li <sub>2</sub> O              | Fm-3m (225)                  | 4.623             | 4.623      | 4.623      | 90       | 90      | 90       |
|                                                                        | 60431     | Li <sub>2</sub> O              | Fm-3m (225)                  | 4.628             | 4.628      | 4.628      | 90       | 90      | 90       |
|                                                                        | 173180    | Li <sub>2</sub> O              | Fm-3m (225)                  | 4.614(1)          | 4.614(1)   | 4.614(1)   | 90       | 90      | 90       |
|                                                                        | 173193    | Li <sub>2</sub> O              | Fm-3m (225)                  | 4.6124(1)         | 4.6124(1)  | 4.6124(1)  | 90       | 90      | 90       |
|                                                                        | 173206    | Li <sub>2</sub> O              | Fm-3m (225)                  | 4.6128(4)         | 4.6128(4)  | 4.6128(4)  | 90       | 90      | 90       |
|                                                                        | 182024    | Li <sub>2</sub> O              | Fm-3m (225)                  | 4.728(5)          | 4.728(5)   | 4.728(5)   | 90       | 90      | 90       |
|                                                                        | 182025    | Li <sub>2</sub> O              | Fm-3m (225)                  | 4.764(5)          | 4.764(5)   | 4.764(5)   | 90       | 90      | 90       |
|                                                                        | 182026    | Li <sub>2</sub> O              | Fm-3m (225)                  | 4.782(5)          | 4.782(5)   | 4.782(5)   | 90       | 90      | 90       |
|                                                                        | 182027    | Li <sub>2</sub> O              | Fm-3m (225)                  | 4.807(5)          | 4.807(5)   | 4.807(5)   | 90       | 90      | 90       |
|                                                                        | 182028    | Li <sub>2</sub> O              | Fm-3m (225)                  | 4.837(5)          | 4.837(5)   | 4.837(5)   | 90       | 90      | 90       |
|                                                                        | 257372    | Li <sub>2</sub> O              | Fm-3m (225)                  | 4.61549(5)        | 4.61549(5) | 4.61549(5) | 90       | 90      | 90       |
|                                                                        | 642216    | Li <sub>2</sub> O              | Fm-3m (225)                  | 4.693(5)          | 4.693(5)   | 4.693(5)   | 90       | 90      | 90       |
| LiO <sub>2</sub> (Li-O)<br>Srtuc_Num_1                                 | 25530     | Li <sub>2</sub> O <sub>2</sub> | P6 <sub>3</sub> /mmc (194)   | 3.142             | 3.142      | 7.65       | 90       | 90      | 120      |
| No structure type (Li-O)<br>Srtuc_Num_2                                | 24143     | Li <sub>2</sub> O <sub>2</sub> | P-6 (174)                    | 6.305             | 6.305      | 7.71       | 90       | 90      | 120      |
| No structure type (Li-O)<br>Srtuc_Num_3                                | 108886    | Li <sub>2</sub> O              | R-3mH (166)                  | 3.624             | 3.624      | 7.97       | 90       | 90      | 120      |
| La <sub>2</sub> O <sub>3</sub><br>Srtuc_Num_4                          | 24693     | La <sub>2</sub> O <sub>3</sub> | P-3m1 (164)                  | 3.94              | 3.94       | 6.13       | 90       | 90      | 120      |
|                                                                        | 28555     | La <sub>2</sub> O <sub>3</sub> | P6 <sub>3</sub> /mmc (194)   | 3.9373            | 3.9373     | 6.1299     | 90       | 90      | 120      |
|                                                                        | 56771     | La <sub>2</sub> O <sub>3</sub> | P-3m1 (164)                  | 3.934(1)          | 3.934      | 6.136(2)   | 90       | 90      | 120      |
|                                                                        | 100204    | La <sub>2</sub> O <sub>3</sub> | P-3m1 (164)                  | 3.9381(3)         | 3.9381(3)  | 6.1361(6)  | 90       | 90      | 120      |
|                                                                        | 100205    | La <sub>2</sub> O <sub>3</sub> | P-3m1 (164)                  | 4.039(2)          | 4.039(2)   | 6.403(3)   | 90       | 90      | 120      |
|                                                                        | 100208    | La <sub>2</sub> O <sub>3</sub> | P6 <sub>3</sub> /mmc (194)   | 4.057(2)          | 4.057(2)   | 6.430(3)   | 90       | 90      | 120      |
|                                                                        | 100209    | La <sub>2</sub> O <sub>3</sub> | P6 <sub>3</sub> /mmc (194)   | 4.057(2)          | 4.057(2)   | 6.430(3)   | 90       | 90      | 120      |
|                                                                        | 100210    | La <sub>2</sub> O <sub>3</sub> | P6 <sub>3</sub> /mmc (194)   | 4.057(2)          | 4.057(2)   | 6.430(3)   | 90       | 90      | 120      |
|                                                                        | 100215    | La <sub>2</sub> O <sub>3</sub> | P6 <sub>3</sub> /mmc (194)   | 4.057(2)          | 4.057(2)   | 6.430(3)   | 90       | 90      | 120      |
|                                                                        | 192270    | La <sub>2</sub> O <sub>3</sub> | P-3m1 (164)                  | 3.9137(7)         | 3.9137(7)  | 6.0984(0)  | 90       | 90      | 120      |
|                                                                        | 257585    | La <sub>2</sub> O <sub>3</sub> | P-3m1 (164)                  | 3.968(1)          | 3.968(1)   | 6.215(1)   | 90       | 90      | 120      |
|                                                                        | 641599    | La <sub>2</sub> O <sub>3</sub> | P-3m1 (164)                  | 3.936             | 3.936      | 6.128      | 90       | 90      | 120      |
|                                                                        | 641603    | La <sub>2</sub> O <sub>3</sub> | P-3m1 (164)                  | 3.937             | 3.937      | 6.13       | 90       | 90      | 120      |
| La <sub>2</sub> O <sub>3</sub> (c15)<br>Srtuc_Num_5                    | 44692     | La <sub>2</sub> O <sub>3</sub> | Im-3m (229)                  | 4.51(1)           | 4.51       | 4.51       | 90       | 90      | 90       |
| Zirconia-<br>ZrO <sub>2</sub> (HT)<br>Srtuc_Num_6                      | 9993      | ZrO <sub>2</sub>               | P4 <sub>2</sub> /nmc S (137) | 3.64              | 3.64       | 5.27       | 90       | 90      | 90       |
|                                                                        | 23928     | ZrO <sub>2</sub>               | P4 <sub>2</sub> /nmc S (137) | 3.64              | 3.64       | 5.27       | 90       | 90      | 90       |
|                                                                        | 51051     | ZrO <sub>2</sub>               | P4 <sub>2</sub> /nmc Z (137) | 3.64              | 3.64       | 5.27       | 90       | 90      | 90       |
|                                                                        | 66781     | ZrO <sub>2</sub>               | P4 <sub>2</sub> /nmc Z (137) | 3.5960(1)         | 3.5960(1)  | 5.1841(2)  | 90       | 90      | 90       |
|                                                                        | 66782     | ZrO <sub>2</sub>               | P4 <sub>2</sub> /nmc Z (137) | 3.5958(1)         | 3.5958(1)  | 5.1844(2)  | 90       | 90      | 90       |
|                                                                        | 66783     | ZrO <sub>2</sub>               | P4 <sub>2</sub> /nmc Z (137) | 3.5957(8)         | 3.5957(8)  | 5.1844(2)  | 90       | 90      | 90       |
|                                                                        | 66784     | ZrO <sub>2</sub>               | P4 <sub>2</sub> /nmc Z (137) | 3.5957(1)         | 3.5957(1)  | 5.1845(2)  | 90       | 90      | 90       |
|                                                                        | 66785     | ZrO <sub>2</sub>               | P4 <sub>2</sub> /nmc Z       | 3.5961(1)         | 3.5961(1)  | 5.1843(2)  | 90       | 90      | 90       |

|       |                                                             |                                 |             |             |             |    |    |    |
|-------|-------------------------------------------------------------|---------------------------------|-------------|-------------|-------------|----|----|----|
|       |                                                             | (137)                           |             |             |             |    |    |    |
| 66786 | ZrO <sub>2</sub>                                            | P4 <sub>2</sub> /nmc Z<br>(137) | 3.5958(1)   | 3.5958(1)   | 5.1849(2)   | 90 | 90 | 90 |
| 66787 | ZrO <sub>2</sub>                                            | P4 <sub>2</sub> /nmc Z<br>(137) | 3.5957(2)   | 3.5957(2)   | 5.1850(3)   | 90 | 90 | 90 |
| 66788 | ZrO <sub>2</sub>                                            | P4 <sub>2</sub> /nmc Z<br>(137) | 3.5936(4)   | 3.5936(4)   | 5.1814(6)   | 90 | 90 | 90 |
| 66789 | ZrO <sub>2</sub>                                            | P4 <sub>2</sub> /nmc Z<br>(137) | 3.5916(8)   | 3.5916(8)   | 5.179(2)    | 90 | 90 | 90 |
| 68589 | ZrO <sub>2</sub>                                            | P4 <sub>2</sub> /nmc S<br>(137) | 3.5961(2)   | 3.5961(2)   | 5.1770(4)   | 90 | 90 | 90 |
| 68781 | ZrO <sub>2</sub>                                            | P4 <sub>2</sub> /nmc Z<br>(137) | 3.5925(3)   | 3.5925(3)   | 5.1837(5)   | 90 | 90 | 90 |
| 70014 | ZrO <sub>1.99</sub>                                         | P4 <sub>2</sub> /nmc Z<br>(137) | 3.6067(4)   | 3.6067(4)   | 5.1290(7)   | 90 | 90 | 90 |
| 70015 | ZrO <sub>1.88</sub>                                         | P4 <sub>2</sub> /nmc Z<br>(137) | 3.6067(4)   | 3.6067(4)   | 5.1520(8)   | 90 | 90 | 90 |
| 72699 | Zr <sub>0.94</sub> O <sub>2</sub>                           | P4 <sub>2</sub> /nmc Z<br>(137) | 3.6231(11)  | 3.6231(11)  | 5.2412(28)  | 90 | 90 | 90 |
| 72700 | Zr <sub>0.94</sub> O <sub>2</sub>                           | P4 <sub>2</sub> /nmc Z<br>(137) | 3.62802(6)  | 3.62802(6)  | 5.2493(14)  | 90 | 90 | 90 |
| 72701 | Zr <sub>0.94</sub> O <sub>2</sub>                           | P4 <sub>2</sub> /nmc Z<br>(137) | 3.63187(12) | 3.63187(12) | 5.25943(26) | 90 | 90 | 90 |
| 72702 | Zr <sub>0.946</sub> O <sub>2</sub>                          | P4 <sub>2</sub> /nmc Z<br>(137) | 3.63981(11) | 3.63981(11) | 5.26166(15) | 90 | 90 | 90 |
| 72703 | Zr <sub>0.942</sub> O <sub>2</sub>                          | P4 <sub>2</sub> /nmc Z<br>(137) | 3.63273(7)  | 3.63273(7)  | 5.26189(12) | 90 | 90 | 90 |
| 72704 | Zr <sub>0.952</sub> O <sub>2</sub>                          | P4 <sub>2</sub> /nmc Z<br>(137) | 3.63700(9)  | 3.63700(9)  | 5.26957(17) | 90 | 90 | 90 |
| 72705 | Zr <sub>0.958</sub> O <sub>2</sub>                          | P4 <sub>2</sub> /nmc Z<br>(137) | 3.63981(10) | 3.63981(10) | 5.27454(18) | 90 | 90 | 90 |
| 72706 | Zr <sub>0.95</sub> O <sub>2</sub>                           | P4 <sub>2</sub> /nmc Z<br>(137) | 3.64370(10) | 3.64370(10) | 5.28172(19) | 90 | 90 | 90 |
| 72707 | Zr <sub>0.952</sub> O <sub>2</sub>                          | P4 <sub>2</sub> /nmc Z<br>(137) | 3.64548(11) | 3.64548(11) | 5.28497(20) | 90 | 90 | 90 |
| 72708 | Zr <sub>0.952</sub> O <sub>2</sub>                          | P4 <sub>2</sub> /nmc Z<br>(137) | 3.65762(13) | 3.65762(13) | 5.30475(24) | 90 | 90 | 90 |
| 72949 | ZrO <sub>1.95</sub>                                         | P4 <sub>2</sub> /nmc Z<br>(137) | 3.6067(4)   | 3.6067(4)   | 5.1758(8)   | 90 | 90 | 90 |
| 72950 | ZrO <sub>1.99</sub>                                         | P4 <sub>2</sub> /nmc Z<br>(137) | 3.6136(3)   | 3.6136(3)   | 5.1909(5)   | 90 | 90 | 90 |
| 72951 | ZrO <sub>1.96</sub>                                         | P4 <sub>2</sub> /nmc Z<br>(137) | 3.6227(3)   | 3.6227(3)   | 5.2056(6)   | 90 | 90 | 90 |
| 72952 | ZrO <sub>1.97</sub>                                         | P4 <sub>2</sub> /nmc Z<br>(137) | 3.6358(4)   | 3.6358(4)   | 5.2257(7)   | 90 | 90 | 90 |
| 72953 | ZrO <sub>1.98</sub>                                         | P4 <sub>2</sub> /nmc Z<br>(137) | 3.6411(4)   | 3.6411(4)   | 5.2340(7)   | 90 | 90 | 90 |
| 72954 | ZrO <sub>1.96</sub>                                         | P4 <sub>2</sub> /nmc Z<br>(137) | 3.6499(4)   | 3.6499(4)   | 5.2483(8)   | 90 | 90 | 90 |
| 75063 | (La <sub>0.1</sub> Zr <sub>0.9</sub> )<br>O <sub>1.95</sub> | P4 <sub>2</sub> /nmc Z<br>(137) | 3.6447(5)   | 3.6447(5)   | 5.2034(10)  | 90 | 90 | 90 |
| 81036 | (Zr <sub>0.9</sub> La <sub>0.1</sub> )<br>O <sub>1.95</sub> | P4 <sub>2</sub> /nmc Z<br>(137) | 3.6377(7)   | 3.6377(7)   | 5.2059(26)  | 90 | 90 | 90 |
| 85322 | ZrO <sub>2</sub>                                            | P4 <sub>2</sub> /nmc Z<br>(137) | 3.5984(5)   | 3.5984(5)   | 5.152(1)    | 90 | 90 | 90 |
| 88022 | ZrO <sub>2</sub>                                            | P4 <sub>2</sub> /nmc Z<br>(137) | 3.6292(3)   | 3.6292(3)   | 5.1973(9)   | 90 | 90 | 90 |
| 92090 | ZrO <sub>2</sub>                                            | P4 <sub>2</sub> /nmc Z          | 3.5948(2)   | 3.5948(2)   | 5.1824(7)   | 90 | 90 | 90 |

|                                                          |                                      |                              |                         |            |            |            |    |           |    |
|----------------------------------------------------------|--------------------------------------|------------------------------|-------------------------|------------|------------|------------|----|-----------|----|
|                                                          |                                      | (137)                        |                         |            |            |            |    |           |    |
| 92091                                                    | ZrO <sub>2</sub>                     | P4 <sub>2</sub> /nmc Z (137) | 3.565(2)                | 3.565(2)   | 5.037(13)  | 90         | 90 | 90        |    |
| 92092                                                    | ZrO <sub>2</sub>                     | P4 <sub>2</sub> /nmc Z (137) | 3.512(3)                | 3.512(3)   | 4.988(8)   | 90         | 90 | 90        |    |
| 92093                                                    | ZrO <sub>2</sub>                     | P4 <sub>2</sub> /nmc Z (137) | 3.495(1)                | 3.495(1)   | 4.952(3)   | 90         | 90 | 90        |    |
| 93028                                                    | ZrO <sub>2</sub>                     | P4 <sub>2</sub> /nmc S (137) | 3.5815(12)              | 3.5815(12) | 5.1685(40) | 90         | 90 | 90        |    |
| 93029                                                    | ZrO <sub>2</sub>                     | P4 <sub>2</sub> /nmc S (137) | 3.5770(12)              | 3.5770(12) | 5.1589(37) | 90         | 90 | 90        |    |
| 93030                                                    | ZrO <sub>2</sub>                     | P4 <sub>2</sub> /nmc S (137) | 3.5781(3)               | 3.5781(3)  | 5.1623(8)  | 90         | 90 | 90        |    |
| 93031                                                    | ZrO <sub>2</sub>                     | P4 <sub>2</sub> /nmc S (137) | 3.5742(3)               | 3.5742(3)  | 5.1540(8)  | 90         | 90 | 90        |    |
| 93032                                                    | ZrO <sub>2</sub>                     | P4 <sub>2</sub> /nmc S (137) | 3.5794(2)               | 3.5794(2)  | 5.1647(7)  | 90         | 90 | 90        |    |
| 93033                                                    | ZrO <sub>2</sub>                     | P4 <sub>2</sub> /nmc S (137) | 3.5747(2)               | 3.5747(2)  | 5.1558(7)  | 90         | 90 | 90        |    |
| 93123                                                    | ZrO <sub>2</sub>                     | P4 <sub>2</sub> /nmc S (137) | 3.612(1)                | 3.612(1)   | 5.212(1)   | 90         | 90 | 90        |    |
| 93124                                                    | ZrO <sub>2</sub>                     | P4 <sub>2</sub> /nmc S (137) | 3.626(2)                | 3.626(2)   | 5.235(4)   | 90         | 90 | 90        |    |
| 93125                                                    | ZrO <sub>2</sub>                     | P4 <sub>2</sub> /nmc S (137) | 3.642(1)                | 3.642(1)   | 5.275(1)   | 90         | 90 | 90        |    |
| 93126                                                    | ZrO <sub>2</sub>                     | P4 <sub>2</sub> /nmc S (137) | 3.646(1)                | 3.646(1)   | 5.285(1)   | 90         | 90 | 90        |    |
| 94931                                                    | ZrO <sub>2</sub>                     | P4 <sub>2</sub> /nmc Z (137) | 3.596                   | 3.596      | 5.177      | 90         | 90 | 90        |    |
| 97004                                                    | ZrO <sub>2</sub>                     | P4 <sub>2</sub> /nmc Z (137) | 3.598(1)                | 3.598(1)   | 5.185(3)   | 90         | 90 | 90        |    |
| 99744                                                    | Zr <sub>0.88</sub> O <sub>1.78</sub> | P4 <sub>2</sub> /nmc Z (137) | 3.59(6)                 | 3.59(6)    | 5.16(7)    | 90         | 90 | 90        |    |
| 157617                                                   | ZrO <sub>2</sub>                     | P4 <sub>2</sub> /nmc S (137) | 3.6019(3)               | 3.6019(3)  | 5.174(2)   | 90         | 90 | 90        |    |
| 157618                                                   | ZrO <sub>2</sub>                     | P4 <sub>2</sub> /nmc S (137) | 3.6023(6)               | 3.6023(6)  | 5.176(4)   | 90         | 90 | 90        |    |
| 157619                                                   | ZrO <sub>2</sub>                     | P4 <sub>2</sub> /nmc S (137) | 3.6005(3)               | 3.6005(3)  | 5.177(2)   | 90         | 90 | 90        |    |
| 157620                                                   | ZrO <sub>2</sub>                     | P4 <sub>2</sub> /nmc S (137) | 3.5990(3)               | 3.5990(3)  | 5.173(2)   | 90         | 90 | 90        |    |
| 157621                                                   | ZrO <sub>2</sub>                     | P4 <sub>2</sub> /nmc S (137) | 3.6007(3)               | 3.6007(3)  | 5.178(2)   | 90         | 90 | 90        |    |
| 173961                                                   | ZrO <sub>2</sub>                     | P4 <sub>2</sub> /nmc S (137) | 3.6287                  | 3.6287     | 5.207      | 90         | 90 | 90        |    |
| 180936                                                   | ZrO <sub>2</sub>                     | P4 <sub>2</sub> /nmc Z (137) | 3.5975                  | 3.5975     | 5.1649     | 90         | 90 | 90        |    |
| 647692                                                   | ZrO <sub>2</sub>                     | P4 <sub>2</sub> /nmc Z (137) | 3.6526(15)              | 3.6526(15) | 5.2928(27) | 90         | 90 | 90        |    |
| <b>Baddeleyite-ZrO<sub>2</sub>(mP12)<br/>Srtuc_Num_7</b> | 15983                                | ZrO <sub>2</sub>             | P2 <sub>1</sub> /c (14) | 5.22       | 5.27       | 5.38       | 90 | 80.54     | 90 |
|                                                          | 18190                                | ZrO <sub>2</sub>             | P2 <sub>1</sub> /c (14) | 5.145(5)   | 5.2075(5)  | 5.3107(5)  | 90 | 99.23(8)  | 90 |
|                                                          | 26488                                | ZrO <sub>2</sub>             | P2 <sub>1</sub> /c (14) | 5.169(8)   | 5.232(8)   | 5.341(8)   | 90 | 99.25(17) | 90 |
|                                                          | 41010                                | ZrO <sub>2</sub>             | P2 <sub>1</sub> /c (14) | 5.120(22)  | 5.216(3)   | 5.281(6)   | 90 | 99.01(8)  | 90 |
|                                                          | 41572                                | ZrO <sub>2</sub>             | P2 <sub>1</sub> /c (14) | 5.1501(2)  | 5.2077(2)  | 5.3171(2)  | 90 | 99.224(2) | 90 |
|                                                          | 57157                                | ZrO <sub>2</sub>             | P2 <sub>1</sub> /c (14) | 5.1463(8)  | 5.2116(8)  | 5.3134(8)  | 90 | 99.222(1) | 90 |
|                                                          | 57158                                | ZrO <sub>2</sub>             | P2 <sub>1</sub> /c (14) | 5.14608(2) | 5.21177(2) | 5.31301(2) | 90 | 99.222(1) | 90 |
|                                                          | 57451                                | ZrO <sub>2</sub>             | P2 <sub>1</sub> /c (14) | 5.1459(4)  | 5.2115(4)  | 5.3128(4)  | 90 | 99.222(1) | 90 |

|                                                                                                           |        |                                                         |                         |             |             |             |    |             |    |
|-----------------------------------------------------------------------------------------------------------|--------|---------------------------------------------------------|-------------------------|-------------|-------------|-------------|----|-------------|----|
|                                                                                                           | 60900  | ZrO <sub>2</sub>                                        | P2 <sub>1</sub> /c (14) | 5.1507(4)   | 5.2028(4)   | 5.3156(4)   | 90 | 99.196(4)   | 90 |
|                                                                                                           | 60901  | ZrO <sub>2</sub>                                        | P2 <sub>1</sub> /c (14) | 5.1505(4)   | 5.2031(4)   | 5.3154(4)   | 90 | 99.194(4)   | 90 |
|                                                                                                           | 62993  | ZrO <sub>2</sub>                                        | P2 <sub>1</sub> /c (14) | 5.1505(1)   | 5.2116(1)   | 5.3173(1)   | 90 | 99.230(1)   | 90 |
|                                                                                                           | 68782  | ZrO <sub>2</sub>                                        | P2 <sub>1</sub> /c (14) | 5.144(1)    | 5.133(1)    | 5.347(1)    | 90 | 98.88(2)    | 90 |
|                                                                                                           | 72693  | Zr <sub>0.944</sub> O <sub>2</sub>                      | P2 <sub>1</sub> /c (14) | 5.14948(19) | 5.20211(19) | 5.31975(22) | 90 | 99.238(3)   | 90 |
|                                                                                                           | 72694  | Zr <sub>0.932</sub> O <sub>2</sub>                      | P2 <sub>1</sub> /c (14) | 5.1828(2)   | 5.2117(2)   | 5.3731(2)   | 90 | 98.835(3)   | 90 |
|                                                                                                           | 72695  | Zr <sub>0.931</sub> O <sub>2</sub>                      | P2 <sub>1</sub> /c (14) | 5.18549(21) | 5.21202(21) | 5.37736(20) | 90 | 98.7980(28) | 90 |
|                                                                                                           | 72696  | Zr <sub>0.936</sub> O <sub>2</sub>                      | P2 <sub>1</sub> /c (14) | 5.18732(26) | 5.21283(26) | 5.38047(24) | 90 | 98.7710(36) | 90 |
|                                                                                                           | 72697  | Zr <sub>0.93</sub> O <sub>2</sub>                       | P2 <sub>1</sub> /c (14) | 5.18674(43) | 5.21267(46) | 5.38074(44) | 90 | 98.7540(68) | 90 |
|                                                                                                           | 72698  | Zr <sub>0.93</sub> O <sub>2</sub>                       | P2 <sub>1</sub> /c (14) | 5.18733(91) | 5.2146(10)  | 5.38402(90) | 90 | 98.729(14)  | 90 |
|                                                                                                           | 80042  | ZrO <sub>2</sub>                                        | P2 <sub>1</sub> /c (14) | 5.1482(2)   | 5.2076(2)   | 5.3149(2)   | 90 | 99.232(2)   | 90 |
|                                                                                                           | 80043  | ZrO <sub>2</sub>                                        | P2 <sub>1</sub> /c (14) | 5.1484(2)   | 5.2067(2)   | 5.3154(2)   | 90 | 99.229(2)   | 90 |
|                                                                                                           | 80044  | ZrO <sub>2</sub>                                        | P2 <sub>1</sub> /c (14) | 5.1495(40)  | 5.2075(40)  | 5.3164(40)  | 90 | 99.23(6)    | 90 |
|                                                                                                           | 80045  | ZrO <sub>2</sub>                                        | P2 <sub>1</sub> /c (14) | 5.1496(1)   | 5.2076(2)   | 5.3163(2)   | 90 | 99.225(1)   | 90 |
|                                                                                                           | 80046  | ZrO <sub>2</sub>                                        | P2 <sub>1</sub> /c (14) | 5.1491(3)   | 5.2079(3)   | 5.3160(3)   | 90 | 99.225(2)   | 90 |
|                                                                                                           | 80047  | ZrO <sub>2</sub>                                        | P2 <sub>1</sub> /c (14) | 5.1505(2)   | 5.2077(3)   | 5.3164(3)   | 90 | 99.223(2)   | 90 |
|                                                                                                           | 80048  | ZrO <sub>2</sub>                                        | P2 <sub>1</sub> /c (14) | 5.1481(2)   | 5.2059(2)   | 5.3209(2)   | 90 | 99.216(1)   | 90 |
|                                                                                                           | 80049  | ZrO <sub>2</sub>                                        | P2 <sub>1</sub> /c (14) | 5.149(1)    | 5.2026(9)   | 5.313(1)    | 90 | 99.23(2)    | 90 |
|                                                                                                           | 80050  | ZrO <sub>2</sub>                                        | P2 <sub>1</sub> /c (14) | 5.1423(9)   | 5.2000(1)   | 5.311(1)    | 90 | 99.205(6)   | 90 |
|                                                                                                           | 82543  | ZrO <sub>2</sub>                                        | P2 <sub>1</sub> /c (14) | 5.14422(4)  | 5.20969(5)  | 5.31120(50) | 90 | 99.220(1)   | 90 |
|                                                                                                           | 82544  | ZrO <sub>2</sub>                                        | P2 <sub>1</sub> /c (14) | 5.14604(6)  | 5.21162(7)  | 5.31308(70) | 90 | 99.222(1)   | 90 |
|                                                                                                           | 82545  | ZrO <sub>2</sub>                                        | P2 <sub>1</sub> /c (14) | 5.14478(4)  | 5.21028(4)  | 5.31179(40) | 90 | 99.226(6)   | 90 |
|                                                                                                           | 86692  | ZrO <sub>2</sub>                                        | P2 <sub>1</sub> /c (14) | 5.1489(1)   | 5.2118(1)   | 5.3147(1)   | 90 | 99.203(2)   | 90 |
|                                                                                                           | 89426  | ZrO <sub>2</sub>                                        | P2 <sub>1</sub> /c (14) | 5.146(7)    | 5.205(1)    | 5.313(6)    | 90 | 99.1(8)     | 90 |
|                                                                                                           | 94886  | ZrO <sub>2</sub>                                        | P2 <sub>1</sub> /c (14) | 5.1451(3)   | 5.2023(4)   | 5.3219(4)   | 90 | 99.15(3)    | 90 |
|                                                                                                           | 94887  | ZrO <sub>2</sub>                                        | P2 <sub>1</sub> /c (14) | 5.1487(4)   | 5.2023(4)   | 5.3231(4)   | 90 | 99.164(6)   | 90 |
|                                                                                                           | 96537  | ZrO <sub>2</sub>                                        | P2 <sub>1</sub> /c (14) | 5.1510(4)   | 5.2031(4)   | 5.3151(4)   | 90 | 99.197(2)   | 90 |
|                                                                                                           | 157403 | ZrO <sub>2</sub>                                        | P2 <sub>1</sub> /c (14) | 5.1514(4)   | 5.2098(4)   | 5.3204(4)   | 90 | 99.171(3)   | 90 |
|                                                                                                           | 172161 | ZrO <sub>2</sub>                                        | P2 <sub>1</sub> /c (14) | 5.1462(20)  | 5.2082(23)  | 5.3155(24)  | 90 | 99.249(35)  | 90 |
|                                                                                                           | 173959 | ZrO <sub>2</sub>                                        | P2 <sub>1</sub> /c (14) | 5.1974      | 5.298       | 5.3498      | 90 | 99.53       | 90 |
|                                                                                                           | 291120 | ZrO <sub>2</sub>                                        | P2 <sub>1</sub> /c (14) | 5.195(9)    | 5.225(4)    | 5.342(8)    | 90 | 98.17       | 90 |
|                                                                                                           | 417639 | ZrO <sub>2</sub>                                        | P2 <sub>1</sub> /c (14) | 5.14281(9)  | 5.20368(4)  | 5.30971(10) | 90 | 99.166(6)   | 90 |
|                                                                                                           | 647691 | ZrO <sub>2</sub>                                        | P2 <sub>1</sub> /c (14) | 5.1415(5)   | 5.2056(5)   | 5.3128(5)   | 90 | 99.30(8)    | 90 |
|                                                                                                           | 658755 | ZrO <sub>2</sub>                                        | P2 <sub>1</sub> /c (14) | 5.1464(5)   | 5.2116(5)   | 5.3133(5)   | 90 | 99.221(1)   | 90 |
|                                                                                                           | 659226 | ZrO <sub>2</sub>                                        | P2 <sub>1</sub> /c (14) | 5.09        | 5.13        | 5.29        | 90 | 99.89       | 90 |
| <b>Fluorite-CaF<sub>2</sub>,<br/>Fluorite-<br/>CaF<sub>2</sub>(defect),<br/>NaCl, ZrO<br/>Srtuc_Num_8</b> | 28991  | La <sub>0.5</sub> Zr <sub>0.5</sub> O <sub>1.75</sub>   | Fm-3m (225)             | 5.407       | 5.407       | 5.407       | 90 | 90          | 90 |
|                                                                                                           | 53998  | ZrO <sub>2</sub>                                        | Fm-3m (225)             | 5.1         | 5.1         | 5.1         | 90 | 90          | 90 |
|                                                                                                           | 72955  | ZrO <sub>2.12</sub>                                     | Fm-3m (225)             | 5.1291(8)   | 5.1291(8)   | 5.1291(8)   | 90 | 90          | 90 |
|                                                                                                           | 72956  | ZrO <sub>1.87</sub>                                     | Fm-3m (225)             | 5.1523(7)   | 5.1523(7)   | 5.1523(7)   | 90 | 90          | 90 |
|                                                                                                           | 75064  | (La <sub>0.1</sub> Zr <sub>0.9</sub> )O <sub>1.95</sub> | Fm-3m (225)             | 5.1149(20)  | 5.1149(20)  | 5.1149(20)  | 90 | 90          | 90 |
|                                                                                                           | 76019  | ZrO                                                     | Fm-3m (225)             | 4.602       | 4.602       | 4.602       | 90 | 90          | 90 |
|                                                                                                           | 77713  | ZrO                                                     | Fm-3m (225)             | 5.11(4)     | 5.11        | 5.11        | 90 | 90          | 90 |
|                                                                                                           | 81035  | (Zr <sub>0.9</sub> La <sub>0.1</sub> )O <sub>1.95</sub> | Fm-3m (225)             | 5.1635(3)   | 5.1635(3)   | 5.1635(3)   | 90 | 90          | 90 |
|                                                                                                           | 89429  | ZrO <sub>2</sub>                                        | Fm-3m (225)             | 5.135(9)    | 5.135(9)    | 5.135(9)    | 90 | 90          | 90 |
|                                                                                                           | 92095  | ZrO <sub>2</sub>                                        | Fm-3m (225)             | 4.925(2)    | 4.925(2)    | 4.925(2)    | 90 | 90          | 90 |
|                                                                                                           | 92096  | ZrO <sub>2</sub>                                        | Fm-3m (225)             | 4.916(2)    | 4.916(2)    | 4.916(2)    | 90 | 90          | 90 |
|                                                                                                           | 105553 | ZrO <sub>2</sub>                                        | Fm-3m (225)             | 5.09        | 5.09        | 5.09        | 90 | 90          | 90 |
|                                                                                                           | 173962 | ZrO <sub>2</sub>                                        | Fm-3m (225)             | 5.128       | 5.128       | 5.128       | 90 | 90          | 90 |
|                                                                                                           | 253062 | (La <sub>0.5</sub> Zr <sub>0.5</sub> )O <sub>1.75</sub> | Fm-3m (225)             | 5.385(2)    | 5.385(2)    | 5.385(2)    | 90 | 90          | 90 |
|                                                                                                           | 291119 | ZrO <sub>2</sub>                                        | Fm-3m (225)             | 5.145(8)    | 5.145(8)    | 5.145(8)    | 90 | 90          | 90 |
|                                                                                                           | 647689 | ZrO <sub>2</sub>                                        | Fm-3m (225)             | 5.075(10)   | 5.075(10)   | 5.075(10)   | 90 | 90          | 90 |
| <b>ZrO<sub>2</sub>(oP12)<br/>Srtuc_Num_9</b>                                                              | 41011  | ZrO <sub>2</sub>                                        | Pbcm (57)               | 5.005(8)    | 5.235(2)    | 5.051(2)    | 90 | 90          | 90 |
|                                                                                                           | 41012  | ZrO <sub>2</sub>                                        | Pbcm (57)               | 4.992(7)    | 5.229(2)    | 5.046(2)    | 90 | 90          | 90 |

|                                                                                                                        |                                                   |                                                   |                         |              |              |              |             |            |     |
|------------------------------------------------------------------------------------------------------------------------|---------------------------------------------------|---------------------------------------------------|-------------------------|--------------|--------------|--------------|-------------|------------|-----|
|                                                                                                                        | 67004                                             | ZrO <sub>2</sub>                                  | Pbc2 <sub>1</sub> (29)  | 5.068(1)     | 5.260(1)     | 5.077(1)     | 90          | 90         | 90  |
|                                                                                                                        | 77716                                             | ZrO <sub>2</sub>                                  | Pbcm (57)               | 5.0364(1)    | 5.2546(1)    | 5.0855(1)    | 90          | 90         | 90  |
| <b>HfO<sub>2</sub></b><br><b>Srtuc_Num_10</b>                                                                          | 56696                                             | ZrO <sub>2</sub>                                  | Pnma (62)               | 5.520(4)     | 3.47(4)      | 6.503(4)     | 90          | 90         | 90  |
|                                                                                                                        | 79914                                             | ZrO <sub>2</sub>                                  | Pnam (62)               | 5.593(1)     | 6.484(1)     | 3.333(1)     | 90          | 90         | 90  |
|                                                                                                                        | 79915                                             | ZrO <sub>2</sub>                                  | Pnam (62)               | 5.471(3)     | 6.341(4)     | 3.246(1)     | 90          | 90         | 90  |
|                                                                                                                        | 83862                                             | ZrO <sub>2</sub>                                  | Pnam (62)               | 5.5873(2)    | 6.4847(2)    | 3.3298(1)    | 90          | 90         | 90  |
|                                                                                                                        | 173963                                            | ZrO <sub>2</sub>                                  | Pnma (62)               | 5.614        | 3.3474       | 6.5658       | 90          | 90         | 90  |
| <b>Brookite-TiO<sub>2</sub></b><br><b>Srtuc_Num_11</b>                                                                 | 173960                                            | ZrO <sub>2</sub>                                  | Pbca (61)               | 10.1745      | 5.3148       | 5.1357       | 90          | 90         | 90  |
| <b>SmLiO<sub>2</sub></b><br><b>Srtuc_Num_12</b>                                                                        | 239278                                            | LaLiO <sub>2</sub>                                | P2 <sub>1</sub> /c (14) | 5.874(4)     | 6.2129(4)    | 5.8481(7)    | 90          | 102.453(3) | 90  |
| <b>No structure type (Li-La-O)</b><br><b>Srtuc_Num_13</b>                                                              | 259020                                            | La <sub>2</sub> LiO <sub>3.5</sub>                | Fmmm (69)               | 5.196(6)     | 5.136(7)     | 13.279(7)    | 90          | 90         | 90  |
| <b>Pyrochlore-NaCa(Nb<sub>2</sub>O<sub>6</sub>)F, Eu<sub>2</sub>Zr<sub>2</sub>O<sub>7</sub></b><br><b>Srtuc_Num_14</b> | 15165                                             | La <sub>2</sub> (Zr <sub>2</sub> O <sub>7</sub> ) | Fd-3mS (227)            | 10.786       | 10.786       | 10.786       | 90          | 90         | 90  |
|                                                                                                                        | 51573                                             | La <sub>2</sub> (Zr <sub>2</sub> O <sub>7</sub> ) | Fd-3mZ (227)            | 10.7997(3)   | 10.7997(3)   | 10.7997(3)   | 90          | 90         | 90  |
|                                                                                                                        | 150206                                            | La <sub>2</sub> (Zr <sub>2</sub> O <sub>7</sub> ) | Fd-3mZ (227)            | 10.802(1)    | 10.802(1)    | 10.802(1)    | 90          | 90         | 90  |
|                                                                                                                        | 153222                                            | La <sub>2</sub> (Zr <sub>2</sub> O <sub>7</sub> ) | Fd-3mZ (227)            | 10.80470(6)  | 10.80470(6)  | 10.80470(6)  | 90          | 90         | 90  |
|                                                                                                                        | 173795                                            | La <sub>2</sub> (Zr <sub>2</sub> O <sub>7</sub> ) | Fd-3mZ (227)            | 10.8076(5)   | 10.8076(5)   | 10.8076(5)   | 90          | 90         | 90  |
|                                                                                                                        | 180491                                            | La <sub>2</sub> (Zr <sub>2</sub> O <sub>7</sub> ) | Fd-3mS (227)            | 10.808(1)    | 10.808(1)    | 10.808(1)    | 90          | 90         | 90  |
|                                                                                                                        | 184089                                            | La <sub>2</sub> (Zr <sub>2</sub> O <sub>7</sub> ) | Fd-3mZ (227)            | 10.811(4)    | 10.811(4)    | 10.811(4)    | 90          | 90         | 90  |
|                                                                                                                        | 184090                                            | La <sub>2</sub> (Zr <sub>2</sub> O <sub>7</sub> ) | Fd-3mZ (227)            | 10.828(4)    | 10.828(4)    | 10.828(4)    | 90          | 90         | 90  |
|                                                                                                                        | 184091                                            | La <sub>2</sub> (Zr <sub>2</sub> O <sub>7</sub> ) | Fd-3mZ (227)            | 10.848(4)    | 10.848(4)    | 10.848(4)    | 90          | 90         | 90  |
|                                                                                                                        | 184092                                            | La <sub>2</sub> (Zr <sub>2</sub> O <sub>7</sub> ) | Fd-3mZ (227)            | 10.869(4)    | 10.869(4)    | 10.869(4)    | 90          | 90         | 90  |
|                                                                                                                        | 184093                                            | La <sub>2</sub> (Zr <sub>2</sub> O <sub>7</sub> ) | Fd-3mZ (227)            | 10.892(3)    | 10.892(3)    | 10.892(3)    | 90          | 90         | 90  |
|                                                                                                                        | 184094                                            | La <sub>2</sub> (Zr <sub>2</sub> O <sub>7</sub> ) | Fd-3mZ (227)            | 10.910(4)    | 10.910(4)    | 10.910(4)    | 90          | 90         | 90  |
|                                                                                                                        | 184095                                            | La <sub>2</sub> (Zr <sub>2</sub> O <sub>7</sub> ) | Fd-3mZ (227)            | 10.915(4)    | 10.915(4)    | 10.915(4)    | 90          | 90         | 90  |
|                                                                                                                        | 184096                                            | La <sub>2</sub> (Zr <sub>2</sub> O <sub>7</sub> ) | Fd-3mZ (227)            | 10.921(4)    | 10.921(4)    | 10.921(4)    | 90          | 90         | 90  |
|                                                                                                                        | 184097                                            | La <sub>2</sub> (Zr <sub>2</sub> O <sub>7</sub> ) | Fd-3mZ (227)            | 10.927(4)    | 10.927(4)    | 10.927(4)    | 90          | 90         | 90  |
|                                                                                                                        | 184098                                            | La <sub>2</sub> (Zr <sub>2</sub> O <sub>7</sub> ) | Fd-3mZ (227)            | 10.933(4)    | 10.933(4)    | 10.933(4)    | 90          | 90         | 90  |
|                                                                                                                        | 184099                                            | La <sub>2</sub> (Zr <sub>2</sub> O <sub>7</sub> ) | Fd-3mZ (227)            | 10.939(3)    | 10.939(3)    | 10.939(3)    | 90          | 90         | 90  |
|                                                                                                                        | 184100                                            | La <sub>2</sub> (Zr <sub>2</sub> O <sub>7</sub> ) | Fd-3mZ (227)            | 10.945(4)    | 10.945(4)    | 10.945(4)    | 90          | 90         | 90  |
|                                                                                                                        | 184101                                            | La <sub>2</sub> (Zr <sub>2</sub> O <sub>7</sub> ) | Fd-3mZ (227)            | 10.951(4)    | 10.951(4)    | 10.951(4)    | 90          | 90         | 90  |
|                                                                                                                        | 184102                                            | La <sub>2</sub> (Zr <sub>2</sub> O <sub>7</sub> ) | Fd-3mZ (227)            | 10.957(4)    | 10.957(4)    | 10.957(4)    | 90          | 90         | 90  |
|                                                                                                                        | 189341                                            | La <sub>2</sub> (Zr <sub>2</sub> O <sub>7</sub> ) | Fd-3mZ (227)            | 10.812(1)    | 10.812(1)    | 10.812(1)    | 90          | 90         | 90  |
|                                                                                                                        | 189344                                            | La <sub>2</sub> (Zr <sub>2</sub> O <sub>7</sub> ) | Fd-3mZ (227)            | 10.809(1)    | 10.809(1)    | 10.809(1)    | 90          | 90         | 90  |
|                                                                                                                        | 248648                                            | La <sub>2</sub> (Zr <sub>2</sub> O <sub>7</sub> ) | Fd-3mZ (227)            | 10.875(1)    | 10.875(1)    | 10.875(1)    | 90          | 90         | 90  |
|                                                                                                                        | 248649                                            | La <sub>2</sub> (Zr <sub>2</sub> O <sub>7</sub> ) | Fd-3mZ (227)            | 10.906(1)    | 10.906(1)    | 10.906(1)    | 90          | 90         | 90  |
|                                                                                                                        | 248878                                            | La <sub>2</sub> (Zr <sub>2</sub> O <sub>7</sub> ) | Fd-3mZ (227)            | 10.78864(10) | 10.78864(10) | 10.78864(10) | 90          | 90         | 90  |
| 253061                                                                                                                 | La <sub>2</sub> (Zr <sub>2</sub> O <sub>7</sub> ) | Fd-3mZ (227)                                      | 10.799(8)               | 10.799(8)    | 10.799(8)    | 90           | 90          | 90         |     |
| 253063                                                                                                                 | La <sub>2</sub> (Zr <sub>2</sub> O <sub>7</sub> ) | Fd-3mZ (227)                                      | 10.798(3)               | 10.798(3)    | 10.798(3)    | 90           | 90          | 90         |     |
| <b>Li<sub>2</sub>PbO<sub>3</sub>, Cu<sub>2</sub>GeS<sub>3</sub></b><br><b>Srtuc_Num_15</b>                             | 31941                                             | Li <sub>2</sub> ZrO <sub>3</sub>                  | Cc (9)                  | 5.427        | 9.025        | 5.427        | 90          | 112.75     | 90  |
|                                                                                                                        | 35236                                             | Li <sub>1.82</sub> ZrO <sub>3</sub>               | C2/c (15)               | 5.4218(2)    | 9.0216(4)    | 5.4187(2)    | 90          | 112.709(2) | 90  |
|                                                                                                                        | 94565                                             | Li <sub>2</sub> ZrO <sub>3</sub>                  | C2/c (15)               | 5.5208(5)    | 9.0759(11)   | 5.4758(5)    | 90          | 113.485(7) | 90  |
|                                                                                                                        | 94893                                             | Li <sub>2</sub> ZrO <sub>3</sub>                  | C2/c (15)               | 5.4089(1)    | 9.0309(2)    | 5.4144(1)    | 90          | 112.498(1) | 90  |
|                                                                                                                        | 94894                                             | Li <sub>2</sub> ZrO <sub>3</sub>                  | C2/c (15)               | 5.4163(1)    | 9.0262(2)    | 5.4156(1)    | 90          | 112.615(1) | 90  |
|                                                                                                                        | 94895                                             | Li <sub>2</sub> ZrO <sub>3</sub>                  | C2/c (15)               | 5.4240(1)    | 9.0263(2)    | 5.4197(1)    | 90          | 112.701(1) | 90  |
|                                                                                                                        | 94896                                             | Li <sub>2</sub> ZrO <sub>3</sub>                  | C2/c (15)               | 5.4392(1)    | 9.0383(2)    | 5.4302(1)    | 90          | 112.791(1) | 90  |
|                                                                                                                        | 94897                                             | Li <sub>2</sub> ZrO <sub>3</sub>                  | C2/c (15)               | 5.4686(1)    | 9.0555(1)    | 5.4477(1)    | 90          | 113.002(1) | 90  |
|                                                                                                                        | 241300                                            | Li <sub>1.85</sub> ZrO <sub>3</sub>               | C2/c (15)               | 5.4268(1)    | 9.0201(3)    | 5.4184(6)    | 90          | 112.774(3) | 90  |
|                                                                                                                        | 241301                                            | Li <sub>1.8</sub> ZrO <sub>3</sub>                | C2/c (15)               | 5.4253(3)    | 9.0229(4)    | 5.4186(6)    | 90          | 112.737(2) | 90  |
| 291154                                                                                                                 | Li <sub>2</sub> ZrO <sub>3</sub>                  | C2/c (15)                                         | 5.4264(1)               | 9.0258(2)    | 5.4211(1)    | 90           | 112.7234(8) | 90         |     |
| <b>Li<sub>6</sub>Zr<sub>2</sub>O<sub>7</sub></b><br><b>Srtuc_Num_16</b>                                                | 41321                                             | Li <sub>6</sub> Zr <sub>2</sub> O <sub>7</sub>    | C2/c (15)               | 10.445(1)    | 5.989(1)     | 10.200(1)    | 90          | 100.26(1)  | 90  |
|                                                                                                                        | 73835                                             | Li <sub>6</sub> Zr <sub>2</sub> O <sub>7</sub>    | C2/c (15)               | 10.440(4)    | 5.991(1)     | 10.204(2)    | 90          | 100.25(3)  | 90  |
|                                                                                                                        | 73836                                             | Li <sub>6</sub> Zr <sub>2</sub> O <sub>7</sub>    | C2/c (15)               | 10.4428(1)   | 5.9877(1)    | 10.2014(1)   | 90          | 100.266(1) | 90  |
| <b>Li<sub>8</sub>IrO<sub>6</sub></b>                                                                                   | 61217                                             | Li <sub>8</sub> (IrO <sub>6</sub> )               | R-3H (148)              | 5.4151(6)    | 5.4151(6)    | 15.0584(37)  | 90          | 90         | 120 |

| Srtuc_Num_17                                                    |        |                                                                 |                                         |            |            |            |    |    |    |
|-----------------------------------------------------------------|--------|-----------------------------------------------------------------|-----------------------------------------|------------|------------|------------|----|----|----|
| <b>No structure type (La_Zr_O)</b>                              | 203085 | Li <sub>4</sub> Zr <sub>3</sub> O <sub>8</sub>                  | I <sub>4</sub> <sub>1</sub> /amdZ (141) | 4.265      | 4.265      | 9.0149     | 90 | 90 | 90 |
| <b>Srtuc_Num_18</b>                                             |        |                                                                 |                                         |            |            |            |    |    |    |
| <b>Li<sub>7</sub>La<sub>3</sub>Sn<sub>2</sub>O<sub>12</sub></b> | 183684 | Li <sub>7</sub> La <sub>3</sub> Zr <sub>2</sub> O <sub>12</sub> | I <sub>4</sub> <sub>1</sub> /acdZ (142) | 13.1189(4) | 13.1189(4) | 12.6701(4) | 90 | 90 | 90 |
|                                                                 | 183685 | Li <sub>7</sub> La <sub>3</sub> Zr <sub>2</sub> O <sub>12</sub> | I <sub>4</sub> <sub>1</sub> /acdZ (142) | 13.0920(9) | 13.0920(9) | 12.618(1)  | 90 | 90 | 90 |
|                                                                 | 191528 | Li <sub>7</sub> La <sub>3</sub> Zr <sub>2</sub> O <sub>12</sub> | I <sub>4</sub> <sub>1</sub> /acdZ (142) | 13.1065(1) | 13.1065(1) | 12.6143(1) | 90 | 90 | 90 |
|                                                                 | 238686 | Li <sub>7</sub> La <sub>3</sub> Zr <sub>2</sub> O <sub>12</sub> | I <sub>4</sub> <sub>1</sub> /acdZ (142) | 13.1954(2) | 13.1954(2) | 12.8686(3) | 90 | 90 | 90 |
|                                                                 | 238687 | Li <sub>7</sub> La <sub>3</sub> Zr <sub>2</sub> O <sub>12</sub> | I <sub>4</sub> <sub>1</sub> /acdZ (142) | 13.1225(1) | 13.1225(1) | 12.6674(2) | 90 | 90 | 90 |
|                                                                 | 246816 | Li <sub>7</sub> La <sub>3</sub> Zr <sub>2</sub> O <sub>12</sub> | I <sub>4</sub> <sub>1</sub> /acdZ (142) | 13.134(4)  | 13.134(4)  | 12.663(8)  | 90 | 90 | 90 |
|                                                                 | 246817 | Li <sub>7</sub> La <sub>3</sub> Zr <sub>2</sub> O <sub>12</sub> | I <sub>4</sub> <sub>1</sub> /acdZ (142) | 13.1279(5) | 13.1279(5) | 12.6715(5) | 90 | 90 | 90 |
| <b>Li<sub>7</sub>La<sub>3</sub>Zr<sub>2</sub>O<sub>12</sub></b> | 183607 | Li <sub>7</sub> La <sub>3</sub> Zr <sub>2</sub> O <sub>12</sub> | Ia-3d (230)                             | 13.0035    | 13.0035    | 13.0035    | 90 | 90 | 90 |
|                                                                 | 184230 | Li <sub>7</sub> La <sub>3</sub> Zr <sub>2</sub> O <sub>12</sub> | Ia-3d (230)                             | 13.0035    | 13.0035    | 13.0035    | 90 | 90 | 90 |
|                                                                 | 238685 | Li <sub>7</sub> La <sub>3</sub> Zr <sub>2</sub> O <sub>12</sub> | Ia-3d (230)                             | 13.1842(3) | 13.1842(3) | 13.1842(3) | 90 | 90 | 90 |
|                                                                 | 261302 | Li <sub>7</sub> La <sub>3</sub> Zr <sub>2</sub> O <sub>12</sub> | Ia-3d (230)                             | 12.9751(1) | 12.9751(1) | 12.9751(1) | 90 | 90 | 90 |
|                                                                 | 422259 | Li <sub>7</sub> La <sub>3</sub> Zr <sub>2</sub> O <sub>12</sub> | Ia-3d (230)                             | 12.9827(4) | 12.9827(4) | 12.9827(4) | 90 | 90 | 90 |
| <b>Srtuc_Num_20</b>                                             |        |                                                                 |                                         |            |            |            |    |    |    |

**Table S1** The list of 218 constituent compounds. The structure type and the number of duplicates for each of 21 groups (Group\_Num\_0~20) are also given.



### Phase identification accuracy comparison

|                                         | Li-La-Zr-O      | Li-Sr-Al-O      |
|-----------------------------------------|-----------------|-----------------|
| Average Pearson correlation coefficient | 0.4899          | 0.5130          |
| CNN classification                      | 96.47% (91.11%) | 99.30% (98.67%) |
| KNN                                     | 13.08% (24.44%) | 35.72% (8.00%)  |
| RF                                      | 63.62% (17.78%) | 87.63% (58.00%) |
| SVM                                     | 42.74% (13.33%) | 45.76% (18.00%) |

**Table S2** The phase identification accuracy comparison between the present (Li-La-Zr-O composition) and previous (Li-Sr-Al-O composition) approaches. The numbers in the parentheses designate the real-data test accuracy. The values presented here indicate the best accuracy obtained from each of the algorithms. The hyper-parameters used for the KNN, RF, and SVM algorithms are the same as those for the phase fraction regression described in the caption of Figure 2.

### Ground-Truth Phase Fraction Data

| Sample Number | Compound                                       |                                                                 |                                                                 | Compound Fraction |        |        |
|---------------|------------------------------------------------|-----------------------------------------------------------------|-----------------------------------------------------------------|-------------------|--------|--------|
| 1             | La <sub>2</sub> O <sub>3</sub>                 | LaLiO <sub>2</sub>                                              | X                                                               | 0.8671            | 0.1329 | 0      |
| 2             | La <sub>2</sub> O <sub>3</sub>                 | La <sub>2</sub> Zr <sub>2</sub> O <sub>7</sub>                  | X                                                               | 0.8006            | 0.1994 | 0      |
| 3             | La <sub>2</sub> O <sub>3</sub>                 | LaLiO <sub>2</sub>                                              | X                                                               | 0.7973            | 0.2027 | 0      |
| 4             | La <sub>2</sub> O <sub>3</sub>                 | La <sub>2</sub> Zr <sub>2</sub> O <sub>7</sub>                  | X                                                               | 0.8222            | 0.1778 | 0      |
| 5             | La <sub>2</sub> O <sub>3</sub>                 | La <sub>2</sub> Zr <sub>2</sub> O <sub>7</sub>                  | X                                                               | 0.6125            | 0.3875 | 0      |
| 6             | La <sub>2</sub> O <sub>3</sub>                 | ZrO <sub>2</sub>                                                | X                                                               | 0.8945            | 0.1055 | 0      |
| 7             | La <sub>2</sub> O <sub>3</sub>                 | La <sub>2</sub> Zr <sub>2</sub> O <sub>7</sub>                  | X                                                               | 0.4908            | 0.5092 | 0      |
| 8             | La <sub>2</sub> O <sub>3</sub>                 | La <sub>2</sub> Zr <sub>2</sub> O <sub>7</sub>                  | X                                                               | 0.546             | 0.454  | 0      |
| 9             | La <sub>2</sub> O <sub>3</sub>                 | ZrO <sub>2</sub>                                                | X                                                               | 0.8547            | 0.1453 | 0      |
| 10            | La <sub>2</sub> O <sub>3</sub>                 | Li <sub>7</sub> La <sub>3</sub> Zr <sub>2</sub> O <sub>12</sub> | X                                                               | 0.8555            | 0.1445 | 0      |
| 11            | La <sub>2</sub> O <sub>3</sub>                 | La <sub>2</sub> Zr <sub>2</sub> O <sub>7</sub>                  | Li <sub>7</sub> La <sub>3</sub> Zr <sub>2</sub> O <sub>12</sub> | 0.4709            | 0.4343 | 0.0948 |
| 12            | La <sub>2</sub> O <sub>3</sub>                 | La <sub>2</sub> Zr <sub>2</sub> O <sub>7</sub>                  | X                                                               | 0.4537            | 0.5463 | 0      |
| 13            | La <sub>2</sub> O <sub>3</sub>                 | La <sub>2</sub> Zr <sub>2</sub> O <sub>7</sub>                  | X                                                               | 0.4055            | 0.5945 | 0      |
| 14            | La <sub>2</sub> O <sub>3</sub>                 | ZrO <sub>2</sub>                                                | La <sub>2</sub> Zr <sub>2</sub> O <sub>7</sub>                  | 0.464             | 0.1575 | 0.3785 |
| 15            | La <sub>2</sub> O <sub>3</sub>                 | LaLiO <sub>2</sub>                                              | Li <sub>7</sub> La <sub>3</sub> Zr <sub>2</sub> O <sub>12</sub> | 0.5485            | 0.1583 | 0.2932 |
| 16            | La <sub>2</sub> O <sub>3</sub>                 | La <sub>2</sub> Zr <sub>2</sub> O <sub>7</sub>                  | X                                                               | 0.3295            | 0.6705 | 0      |
| 17            | La <sub>2</sub> O <sub>3</sub>                 | La <sub>2</sub> Zr <sub>2</sub> O <sub>7</sub>                  | X                                                               | 0.2196            | 0.7804 | 0      |
| 18            | Li <sub>2</sub> O                              | La <sub>2</sub> O <sub>3</sub>                                  | La <sub>2</sub> Zr <sub>2</sub> O <sub>7</sub>                  | 0.1891            | 0.2068 | 0.604  |
| 19            | La <sub>2</sub> O <sub>3</sub>                 | ZrO <sub>2</sub>                                                | La <sub>2</sub> Zr <sub>2</sub> O <sub>7</sub>                  | 0.1783            | 0.1192 | 0.7026 |
| 20            | La <sub>2</sub> O <sub>3</sub>                 | La <sub>2</sub> Zr <sub>2</sub> O <sub>7</sub>                  | Li <sub>7</sub> La <sub>3</sub> Zr <sub>2</sub> O <sub>12</sub> | 0.2604            | 0.5771 | 0.1625 |
| 21            | La <sub>2</sub> O <sub>3</sub>                 | La <sub>2</sub> Zr <sub>2</sub> O <sub>7</sub>                  | X                                                               | 0.2667            | 0.7333 | 0      |
| 22            | La <sub>2</sub> O <sub>3</sub>                 | ZrO <sub>2</sub>                                                | X                                                               | 0.6129            | 0.3871 | 0      |
| 23            | La <sub>2</sub> Zr <sub>2</sub> O <sub>7</sub> | Li <sub>2</sub> ZrO <sub>3</sub>                                | X                                                               | 0.8334            | 0.1666 | 0      |
| 24            | La <sub>2</sub> O <sub>3</sub>                 | La <sub>2</sub> Zr <sub>2</sub> O <sub>7</sub>                  | Li <sub>2</sub> ZrO <sub>3</sub>                                | 0.2103            | 0.6535 | 0.1361 |
| 25            | La <sub>2</sub> O <sub>3</sub>                 | ZrO <sub>2</sub>                                                | La <sub>2</sub> Zr <sub>2</sub> O <sub>7</sub>                  | 0.3773            | 0.5182 | 0.1045 |
| 26            | Li <sub>2</sub> O                              | Li <sub>8</sub> ZrO <sub>6</sub>                                | Li <sub>7</sub> La <sub>3</sub> Zr <sub>2</sub> O <sub>12</sub> | 0.1342            | 0.3455 | 0.5203 |
| 27            | La <sub>2</sub> O <sub>3</sub>                 | La <sub>2</sub> Zr <sub>2</sub> O <sub>7</sub>                  | Li <sub>2</sub> ZrO <sub>3</sub>                                | 0.3896            | 0.1163 | 0.4941 |
| 28            | ZrO <sub>2</sub>                               | La <sub>2</sub> Zr <sub>2</sub> O <sub>7</sub>                  | Li <sub>2</sub> ZrO <sub>3</sub>                                | 0.5029            | 0.3774 | 0.1197 |
| 29            | ZrO <sub>2</sub>                               | La <sub>2</sub> Zr <sub>2</sub> O <sub>7</sub>                  | X                                                               | 0.6226            | 0.3774 | 0      |
| 30            | ZrO <sub>2</sub>                               | La <sub>2</sub> Zr <sub>2</sub> O <sub>7</sub>                  | X                                                               | 0.6647            | 0.3353 | 0      |
| 31            | La <sub>2</sub> O <sub>3</sub>                 | ZrO <sub>2</sub>                                                | X                                                               | 0.2426            | 0.7574 | 0      |
| 32            | Li <sub>6</sub> Zr <sub>2</sub> O <sub>7</sub> | Li <sub>8</sub> ZrO <sub>6</sub>                                | X                                                               | 0.5901            | 0.4099 | 0      |
| 33            | ZrO <sub>2</sub>                               | Li <sub>2</sub> ZrO <sub>3</sub>                                | X                                                               | 0.2928            | 0.7072 | 0      |
| 34            | ZrO <sub>2</sub>                               | Li <sub>2</sub> ZrO <sub>3</sub>                                | X                                                               | 0.5707            | 0.4293 | 0      |
| 35            | ZrO <sub>2</sub>                               | Li <sub>2</sub> ZrO <sub>3</sub>                                | X                                                               | 0.8289            | 0.1711 | 0      |
| 36            | ZrO <sub>2</sub>                               | X                                                               | X                                                               | 0.9041            | 0.0959 | 0      |
| 37            | La <sub>2</sub> O <sub>3</sub>                 | X                                                               | X                                                               | 1                 | 0      | 0      |

|    |                                  |   |   |   |   |   |
|----|----------------------------------|---|---|---|---|---|
| 38 | La <sub>2</sub> O <sub>3</sub>   | X | X | 1 | 0 | 0 |
| 39 | La <sub>2</sub> O <sub>3</sub>   | X | X | 1 | 0 | 0 |
| 40 | La <sub>2</sub> O <sub>3</sub>   | X | X | 1 | 0 | 0 |
| 41 | La <sub>2</sub> O <sub>3</sub>   | X | X | 1 | 0 | 0 |
| 42 | Li <sub>2</sub> O                | X | X | 1 | 0 | 0 |
| 43 | Li <sub>8</sub> ZrO <sub>6</sub> | X | X | 1 | 0 | 0 |
| 44 | ZrO <sub>2</sub>                 | X | X | 1 | 0 | 0 |
| 45 | ZrO <sub>2</sub>                 | X | X | 1 | 0 | 0 |

**Table S3** The phase identification and the relative phase fraction evaluation results for 45 real-world XRD patterns. The conventional rule-based XRD analysis tools such as X'pert pro and FullProf were used to produce the following ground-truth data.

### Real-world data phase identification test accuracy

| Dataset                | D1                 |                    |                    | D2                 |                    |                    |
|------------------------|--------------------|--------------------|--------------------|--------------------|--------------------|--------------------|
| CNN architecture       | CNN_4              | CNN_5              | CNN_6              | CNN_4              | CNN_5              | CNN_6              |
| 10 <sup>th</sup> epoch | 86.67%<br>(95.56%) | 80.00%<br>(93.33%) | 88.88%<br>(96.30%) | 77.78%<br>(92.59%) | 80.00%<br>(93.33%) | 91.11%<br>(97.03%) |
| 16 <sup>th</sup> epoch | 86.67%<br>(95.56%) | 82.22%<br>(94.07%) | 86.67%<br>(95.56%) | 75.56%<br>(91.85%) | 77.78%<br>(92.59%) | 80.00%<br>(93.33%) |
| 17 <sup>th</sup> epoch | 86.67%<br>(95.56%) | 86.67%<br>(95.56%) | 86.67%<br>(95.56%) | 82.22%<br>(94.07%) | 73.33%<br>(91.11%) | 82.22%<br>(94.07%) |
| 18 <sup>th</sup> epoch | 77.78%<br>(92.59%) | 84.44%<br>(94.81%) | 86.67%<br>(95.56%) | 77.78%<br>(92.59%) | 80.00%<br>(93.33%) | 86.67%<br>(95.56%) |
| 19 <sup>th</sup> epoch | 84.44%<br>(94.81%) | 84.44%<br>(94.81%) | 86.67%<br>(95.56%) | 80.00%<br>(93.33%) | 71.11%<br>(90.37%) | 80.00%<br>(93.33%) |
| 20 <sup>th</sup> epoch | 80.00%<br>(93.33%) | 82.22%<br>(94.07%) | 84.44%<br>(94.81%) | 73.33%<br>(91.11%) | 71.11%<br>(90.37%) | 80.00%<br>(93.33%) |

**Table S4** Real-world data phase identification test accuracy for CNN\_n (n=4~6) trained with D1 and D2 datasets, using the weight and bias saved at the 10<sup>th</sup> and 16<sup>th</sup>~20<sup>th</sup> epochs. The total constituent population-based accuracy values are given in the parentheses.

### Synthetic data phase identification test accuracy

| Dataset                | D1                 |                    |                    | D2                 |                    |                    |
|------------------------|--------------------|--------------------|--------------------|--------------------|--------------------|--------------------|
| CNN architecture       | CNN_4              | CNN_5              | CNN_6              | CNN_4              | CNN_5              | CNN_6              |
| 10 <sup>th</sup> epoch | 91.05%<br>(97.00%) | 91.88%<br>(97.27%) | 90.76%<br>(96.90%) | 94.56%<br>(98.18%) | 93.74%<br>(97.90%) | 93.82%<br>(97.93%) |
| 16 <sup>th</sup> epoch | 92.67%<br>(97.54%) | 93.63%<br>(97.86%) | 92.36%<br>(97.44%) | 96.06%<br>(98.68%) | 94.64%<br>(98.21%) | 94.84%<br>(98.28%) |
| 17 <sup>th</sup> epoch | 93.18%<br>(97.72%) | 93.74%<br>(97.90%) | 92.45%<br>(97.47%) | 96.10%<br>(98.70%) | 95.01%<br>(98.33%) | 95.18%<br>(98.39%) |
| 18 <sup>th</sup> epoch | 93.30%<br>(97.76%) | 93.83%<br>(97.94%) | 92.76%<br>(97.57%) | 96.33%<br>(98.77%) | 95.10%<br>(98.36%) | 95.46%<br>(98.48%) |
| 19 <sup>th</sup> epoch | 93.15%<br>(97.71%) | 94.19%<br>(98.06%) | 93.02%<br>(97.66%) | 96.07%<br>(98.69%) | 95.24%<br>(98.41%) | 95.61%<br>(98.53%) |
| 20 <sup>th</sup> epoch | 93.42%<br>(97.80%) | 94.36%<br>(98.11%) | 93.04%<br>(97.67%) | 96.47%<br>(98.82%) | 95.70%<br>(98.56%) | 95.42%<br>(98.47%) |

**Table S5** Synthetic data phase identification test accuracy for CNN<sub>n</sub> (n=4~6) trained with D1 and D2 datasets, using the weight and bias saved at the 10<sup>th</sup> and 16<sup>th</sup>~20<sup>th</sup> epochs. The total constituent population-based accuracy values are given in the parentheses.
